# Supplementary material for: Modulating electronic structure of triazine-based covalent organic frameworks for photocatalytic organic transformations
Source: Royal Society of Chemistry journal article supplement (doi:10.1039/d2ta04541a), 2022-01-01
Supplement: d2ta04541a1.pdf [file d2ta04541a1.pdf]

## Supporting Information

### **Modulating Electronic Structure of Triazine-based Covalent Organic Frameworks for Photocatalytic Organic Transformations**

Zhangjie Gu, Jinjian Wang, Zhen Shan, Miaomiao Wu, Tongtong Liu, Liang Song, Guixiang Wang, Xuehai Ju, Jian Su,\* and Gen Zhang\*

Key Laboratory for Soft Chemistry and Functional Materials of Ministry of Education, School of Chemical Engineering, Nanjing University of Science and Technology, Nanjing, Jiangsu 210094, China.

## Table of Content

|                                                                                                                                                                               |    |
|-------------------------------------------------------------------------------------------------------------------------------------------------------------------------------|----|
| S1. Materials and measurements.....                                                                                                                                           | 4  |
| Materials. ....                                                                                                                                                               | 4  |
| Measurements. ....                                                                                                                                                            | 4  |
| S2. Experimental procedures .....                                                                                                                                             | 6  |
| Synthesis of 5-Bromothiophene-2-carbonitrile.....                                                                                                                             | 6  |
| Synthesis of 2,4,6-Tris(5-bromothiophene-2-yl)-1,3,5-triazine.....                                                                                                            | 6  |
| Synthesis of 5,5',5''-(1,3,5-triazine-2,4,6-triyl) tris(thiophene-2-carbaldehyde) (3TT).....                                                                                  | 6  |
| Figure S1. <sup>1</sup> H NMR spectrum of 3TT.....                                                                                                                            | 7  |
| Figure S2. The photo of COFs. (a) COF-NUST-31, (b) COF-NUST-32, (c) COF-NUST-33. ....                                                                                         | 8  |
| S3. Supplementary characterization.....                                                                                                                                       | 8  |
| Figure S3. FTIR spectra of COF-NUST-31, 3TT, and TAPT. ....                                                                                                                   | 8  |
| Figure S4. FTIR spectra of COF-NUST-32, 3TT, and TAPB. ....                                                                                                                   | 8  |
| Figure S5. FTIR spectra of COF-NUST-33, 3TT, and TPA.....                                                                                                                     | 9  |
| Figure S6. <sup>13</sup> C-NMR spectrum of COF-NUST-31.....                                                                                                                   | 9  |
| Figure S7. <sup>13</sup> C-NMR spectrum of COF-NUST-32.....                                                                                                                   | 9  |
| Figure S8. <sup>13</sup> C-NMR spectrum of COF-NUST-33.....                                                                                                                   | 10 |
| Figure S9. XPS spectra of COF-NUST-31. (a) Survey, (b) N 1s, (c) C 1s, and (d) S 2p. ....                                                                                     | 10 |
| Figure S10. XPS spectra of COF-NUST-32. (a) Survey, (b) N 1s, (c) C 1s, and (d) S 2p. ....                                                                                    | 11 |
| Figure S11. XPS spectra of COF-NUST-33. (a) Survey, (b) N 1s, (c) C 1s, and (d) S 2p. ....                                                                                    | 11 |
| Figure S12. Simulated PXRD patterns and top views for AB stacking of COF-NUST-31 (a) (b), COF-NUST-32 (c) (d), and COF-NUST-33 (e) (f).....                                   | 12 |
| Table S1. Fractional atomic coordinates for simulated COF-NUST-31. ....                                                                                                       | 13 |
| Table S2. Fractional atomic coordinates for simulated COF-NUST-32. ....                                                                                                       | 14 |
| Table S3. Fractional atomic coordinates for simulated COF-NUST-33. ....                                                                                                       | 15 |
| Figure S13. (a) N <sub>2</sub> adsorption-desorption isotherms at 77 K of COFs powders. Pore size distribution of COF-NUST-31 (b), COF-NUST-32 (c), and COF-NUST-33 (d). .... | 16 |
| Figure S14. TGA curves of COFs.....                                                                                                                                           | 16 |
| Figure S15. PXRD patterns at different conditions for COF-NUST-31. ....                                                                                                       | 17 |
| Figure S16. Scanning electron microscopy (SEM) images of COF-NUST-31.....                                                                                                     | 17 |
| Figure S17. Scanning electron microscopy (SEM) images of COF-NUST-32.....                                                                                                     | 17 |
| Figure S18. Scanning electron microscopy (SEM) images of COF-NUST-33.....                                                                                                     | 18 |

|                                                                                                                                                                                                                                                                                        |    |
|----------------------------------------------------------------------------------------------------------------------------------------------------------------------------------------------------------------------------------------------------------------------------------------|----|
| Figure S19. Transmission electron microscopy (TEM) images of COF-NUST-31.....                                                                                                                                                                                                          | 18 |
| Figure S20. Transmission electron microscopy (TEM) images of COF-NUST-32.....                                                                                                                                                                                                          | 18 |
| Figure S21. Transmission electron microscopy (TEM) images of COF-NUST-33.....                                                                                                                                                                                                          | 19 |
| Figure S22. The UV–vis diffuse reflectance spectroscopy of monomers.....                                                                                                                                                                                                               | 19 |
| Figure S23. Mott-Schottky plots of COFs at frequencies of 1000 Hz.....                                                                                                                                                                                                                 | 19 |
| Figure S24. TRPL spectrum for COF-NUST-31.....                                                                                                                                                                                                                                         | 20 |
| Figure S25. TRPL spectrum for COF-NUST-32.....                                                                                                                                                                                                                                         | 20 |
| Figure S26. TRPL spectrum for COF-NUST-33.....                                                                                                                                                                                                                                         | 20 |
| Figure S27. LSV curves under visible light irradiation.....                                                                                                                                                                                                                            | 21 |
| Figure S28. LSV curves under dark.....                                                                                                                                                                                                                                                 | 21 |
| Table S4. The calculated HOMO-LUMO gaps of COFs (in eV).....                                                                                                                                                                                                                           | 21 |
| Figure S29. HOMO of COF-NUST-32 and COF-NUST-33.....                                                                                                                                                                                                                                   | 22 |
| Figure S30. LUMO of COF-NUST-32 and COF-NUST-33.....                                                                                                                                                                                                                                   | 22 |
| Figure S31. (a) The recycling ability of COF-NUST-31 in selective aerobic oxidation of sulfide. (b) PXRD of recovered COF-NUST-31. (c) Fourier transform infrared (FTIR) spectra of recovered COF-NUST-31. (d) Scanning electron microscopy (SEM) images of recovered COF-NUST-31..... | 23 |
| Figure S32. $\cdot\text{O}_2^-$ and $^1\text{O}_2$ signal attenuation after adding PhSMe under elongated light illumination time.....                                                                                                                                                  | 23 |
| Table S5. Photocatalytic performances in this work compared with previous results based on inorganic or organic materials in the literatures.....                                                                                                                                      | 24 |
| S4. Photocatalytic performances of $^1\text{H-NMR}$ spectra.....                                                                                                                                                                                                                       | 25 |
| S5. Reference.....                                                                                                                                                                                                                                                                     | 29 |

## S1. Materials and measurements

### Materials.

All the chemicals are commercially available and used without further purification. 1,3,5-tris (4-aminophenyl) benzene (TAPB), 1,3,5-tri(4-formylphenyl) benzene (TFP), and tris(4-Aminophenyl) amine (TPA) energy chemical (Shanghai, China). Nafion mixture was purchased from Integrity technology (Shanghai, China). FTO Conductive glass was purchased from South China Xiang Cheng Technology (Yi yang, China), n-BuLi was purchased from j&k.

### Measurements.

**nuclear magnetic resonance (NMR):** Liquid state  $^1\text{H}$   $^{13}\text{C}$  NMR spectra of all the samples were collected on a Bruker Advance III instrument with AS500 magnet equipped with a cryoprobe (300 MHz).

**Fourier transform infrared (FT-IR):** Fourier transform infrared (FT-IR) spectra in the range of 4000 to 500  $\text{cm}^{-1}$  were collected by Universal ATR accessory.

**X-ray photoelectron spectroscopy (XPS):** X-ray photoelectron spectroscopy (XPS) spectra were obtained by the Kratos axis supraTM of Shimadzu.

**PXRD:** PXRD patterns were collected on a Bruker D8 Advance diffractometer operated at 40 kV and 40 mA using  $\text{Cu K}\alpha$  radiation and in the range of  $2\text{-}30^\circ$ , the structure of COFs was simulated by Material Studio Software.

**Scanning electron microscope (SEM):** SEM images were collected using a Helios G4 CX.

**Transmission electron microscope (TEM):** TEM images were collected using a JEM-2800.

**Gas adsorption:**  $\text{N}_2$  adsorption and desorption of COFs were performed at 77 K using ASAP 2020, Micromeritics Instrument Corp, USA. Pore size distributions and pore volumes were derived from the adsorption isotherms.

**Thermogravimetric analysis (TGA):** Thermogravimetric analysis (TGA) was carried out on the DTG-60AH from 30 to 800  $^\circ\text{C}$  under  $\text{N}_2$  with a heating rate of 10  $^\circ\text{C min}^{-1}$ .

**UV-Vis spectroscopy (UV-vis):** The ultraviolet-visible diffuse reflectance spectroscopy (UV-vis DRS) was conducted on Shimadzu UV-2600 tested from 220 to 800 nm.

**The time-resolved photoluminescence (TRPL):** The time-resolved photoluminescence (TRPL) was carried on Edinburgh, UK FS5.

**The electron paramagnetic (EPR) measurements:** 10mg COFs powder was dispersed in 10ml solvent, after dispersion, taking 200  $\mu\text{l}$  of sample solution and adding 10  $\mu\text{l}$  of DMPO or TEMPO, mix well and load the sample for test on Bruker A300/E500 at room temperature with light irradiation using a 300 W Xe lamp.

**Photoelectrochemical measurements:** Photoelectrochemical measurements were performed on an electrochemical workstation (CHI 660E, CH Instruments Inc., Shanghai). The preparation method of the working electrode is as follows: First, weigh 5 mg of COFs and put it into the quartz glass vial, adding 1ml ethanol and 30  $\mu$ l Nafion mixture solution, subsequently, ultrasound for 60 minutes. Then, 100  $\mu$ l mixture was transferred into the FTO with  $1 \times 1 \text{ cm}^2$  illuminated area and dried at  $80^\circ\text{C}$  for 8 h. Platinum electrode as the auxiliary electrode, Ag/AgCl electrode as reference electrode,  $\text{Na}_2\text{SO}_4$  (0.2 M) solution was used as the electrolyte solution. Mott–Schottky (M–S) plots were recorded from -1.2 V to 1.2 V at a scan rate of 5 mV/s in the dark at frequencies of 1000 Hz. Linear sweep voltammetry (LSV) curves were recorded at a scan rate of 0.01 V/s from -0.8 to 0.3 V in the light. The on–off transient photocurrent responses were recorded with a sampling interval of 20 s using a 300 W ( $100 \text{ Mw/cm}^2$ ) Xe lamp with a 400 nm-cut filter lamp and a certain applied bias of 0 V. Electrochemical impedance spectroscopy measurements were recorded 10 mV amplitude with over a 0.01 to  $10^6$  Hz frequency range.

## S2. Experimental procedures

### Synthesis of 5-Bromothiophene-2-carbonitrile.

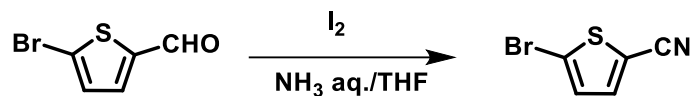

5-bromothiophene-2-carboxaldehyde (10 g, 52.5 mmol) was dissolved in THF (35 ml), and aqueous ammonia (ca. 28 %, 105 mL). Then iodine was added slowly (15 g, 57.6 mmol), The reaction mixture was stirred for 12 h at room temperature, and then quenched with an aqueous  $\text{Na}_2\text{S}_2\text{O}_3$  (ca. 5%, 40 mL). The product was extracted with DCM. The organic layer wash with water for many times and dried over anhydrous  $\text{MgSO}_4$ . the residue was purified by silica gel column chromatography (eluent: DCM/hexane = 3:1, v/v), and dried under vacuum to yield 5-Bromothiophene-2-carbonitrile as a light-yellow oil (yield = 8.9 g, 90%).

### Synthesis of 2,4,6-Tris(5-bromothiophene-2-yl)-1,3,5-triazine.

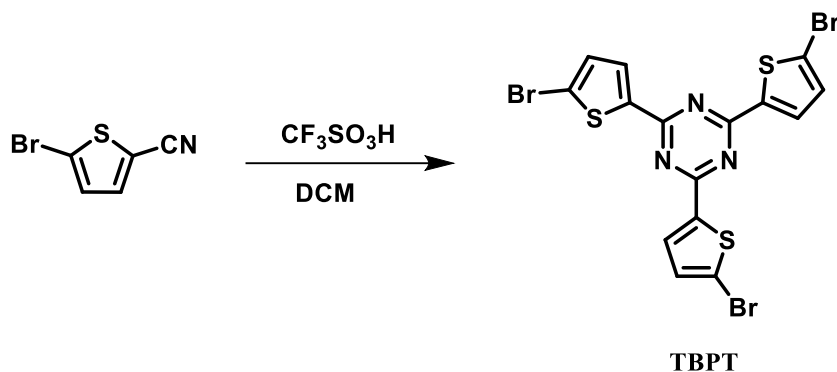

To a stirred solution of 5-Bromothiophene-2-carbonitrile (3.17 g, 16.86 mmol) in dry  $\text{CH}_2\text{Cl}_2$  (80 mL), then trifluoromethanesulfonic acid (2.53 g, 16.86 mmol) was added at 0 °C. The mixture was stirred for 36 h at room temperature. After the solvent was removed, the residue was neutralized with an aqueous  $\text{NaHCO}_3$ . The formed precipitate was collected by filtration, washed with water, methanol, acetone, and hexane in this order, and then dried under vacuum to afford 2 as an off-white solid (yield = 2.6 g, 82 %).

### Synthesis of 5,5',5''-(1,3,5-triazine-2,4,6-triyl) tris(thiophene-2-carbaldehyde) (3TT).

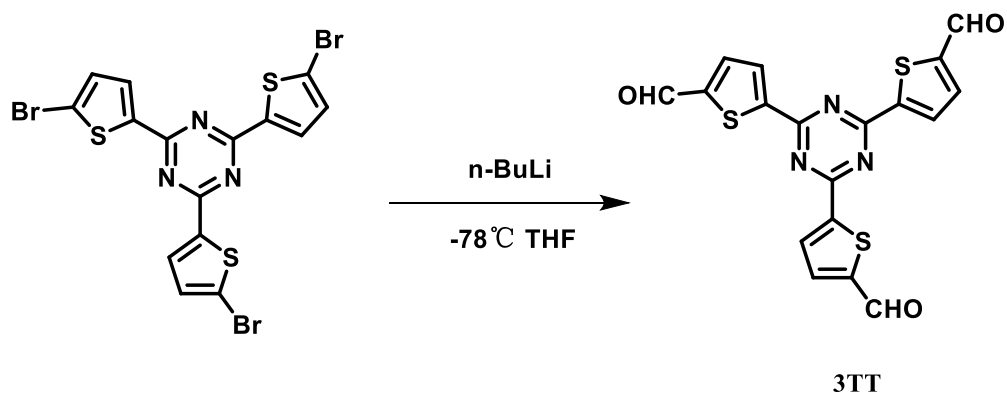

2,4,6-Tris(5-bromothiophene-2-yl)-1,3,5-triazine (0.6 g 1.06 mmol) was dissolved in dry THF (120 ml) and keep temperature at  $-78\text{ }^\circ\text{C}$ . Then n-BuLi (1.68 mL, 2.4 M in hexane) was added dropwise, after 2 h at  $-78\text{ }^\circ\text{C}$ , the dry DMF was added dropwise, and then the reaction mixture was warmed up slowly to ambient temperature overnight. The reaction was quenched with water. Subsequently, the solvent was removed and extracted with DCM. The residue was purified by silica gel column chromatography (eluent: DCM) to give a yellow solid (yield = 98 mg, 22 %).  $^1\text{H NMR}$  (500 MHz,  $\text{CDCl}_3$ ):  $\delta$  10.04 (s, 3H). 8.36-8.35 (d, 3H). 7.88-7.87 (d, 3H).

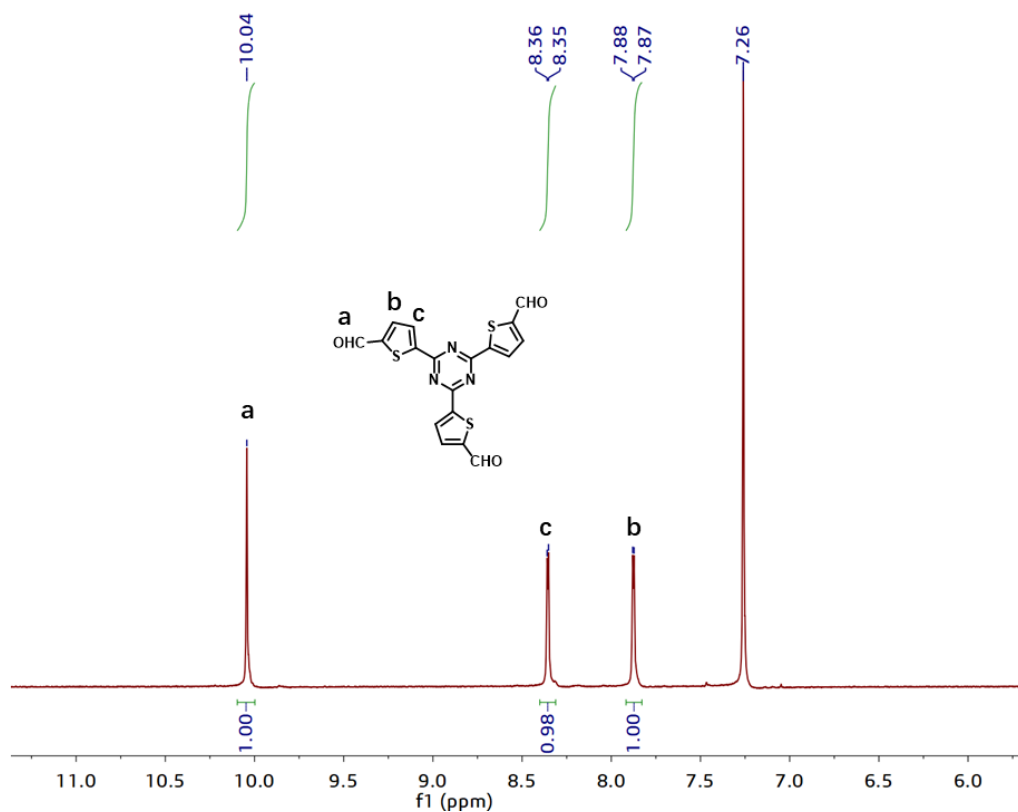

**Figure S1.**  $^1\text{H NMR}$  spectrum of 3TT.

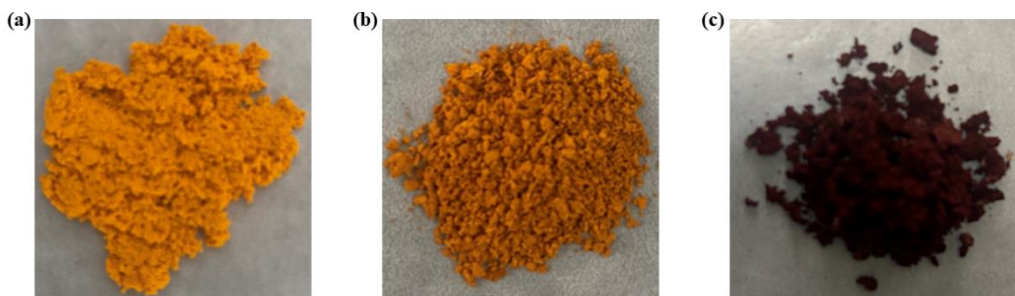

Figure S2. The photo of COFs. (a) COF-NUST-31, (b) COF-NUST-32, (c) COF-NUST-33.

### S3. Supplementary characterization.

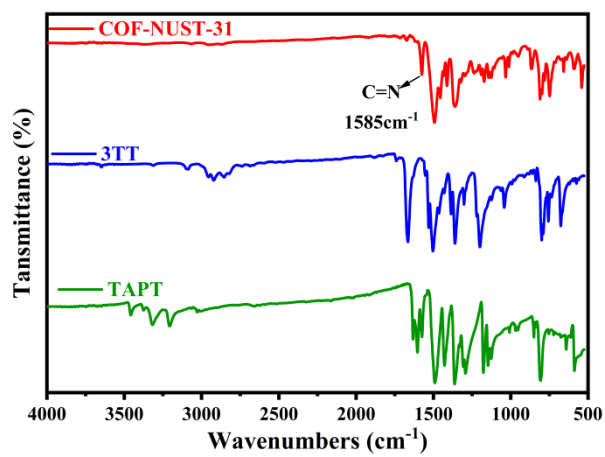

Figure S3. FTIR spectra of COF-NUST-31, 3TT, and TAPT.

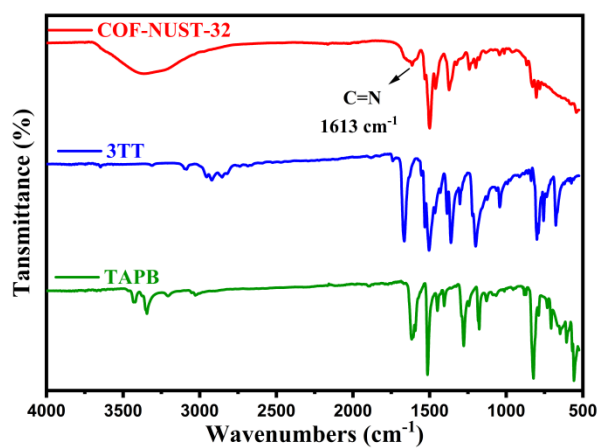

Figure S4. FTIR spectra of COF-NUST-32, 3TT, and TAPB.



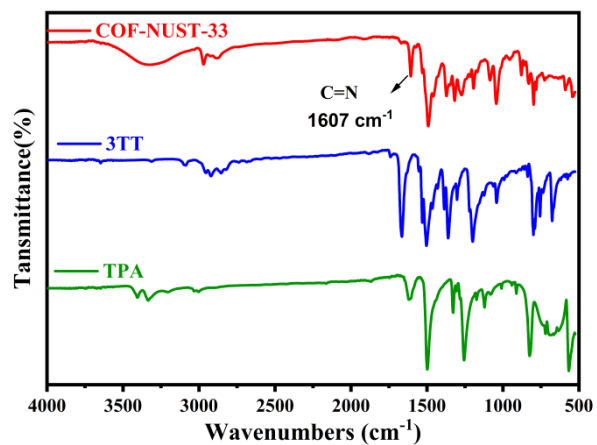

Figure S5. FTIR spectra of COF-NUST-33, 3TT, and TPA.

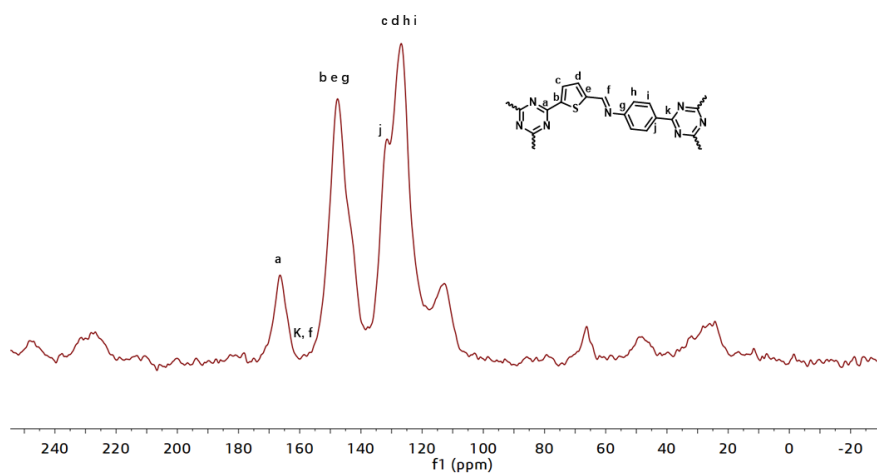

Figure S6. <sup>13</sup>C-NMR spectrum of COF-NUST-31.

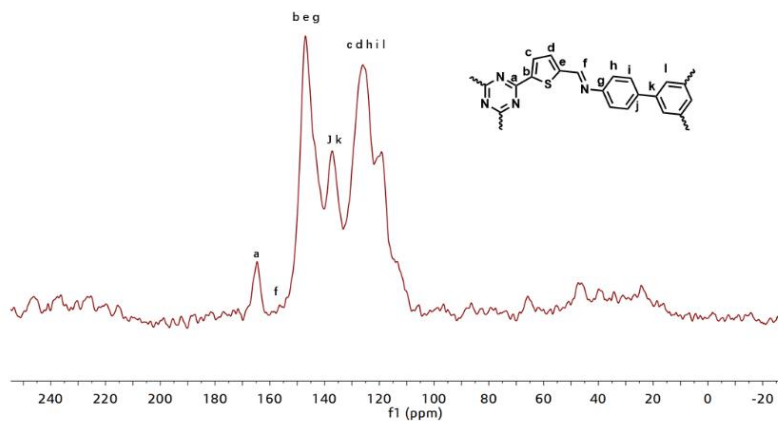

Figure S7. <sup>13</sup>C-NMR spectrum of COF-NUST-32.

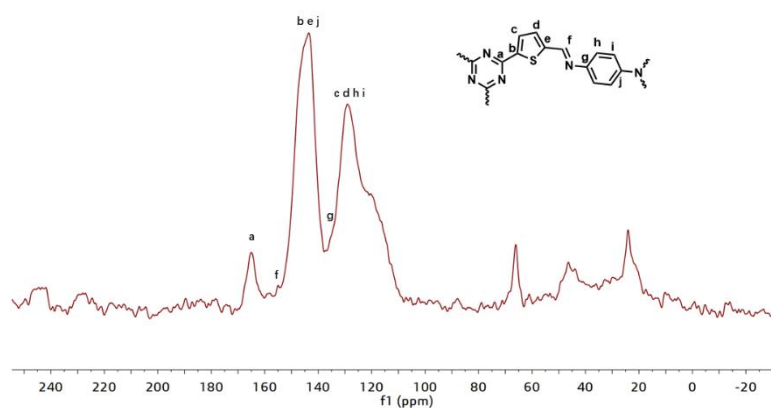

**Figure S8.**  $^{13}\text{C}$ -NMR spectrum of COF-NUST-33.

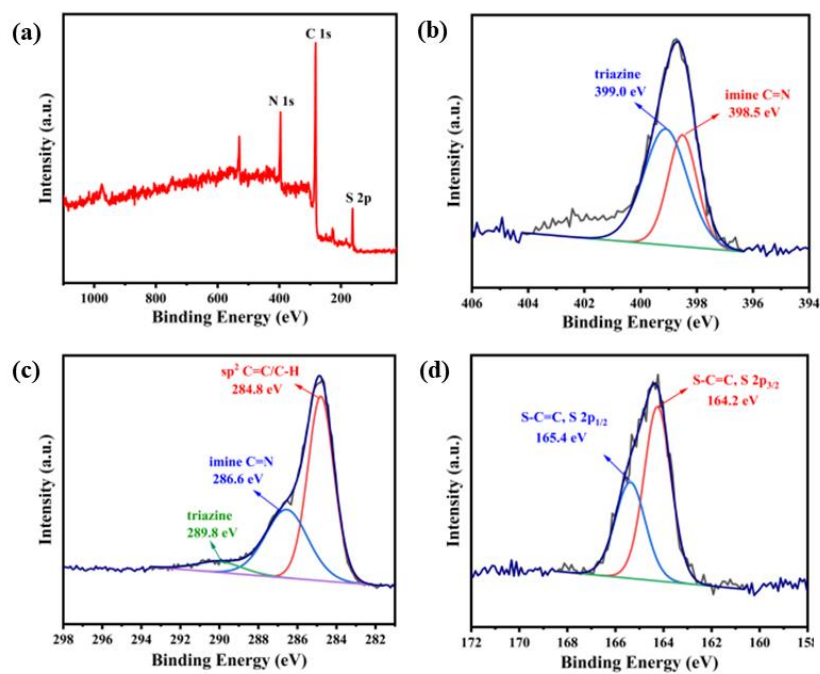

**Figure S9.** XPS spectra of COF-NUST-31. (a) Survey, (b) N 1s, (c) C 1s, and (d) S 2p.

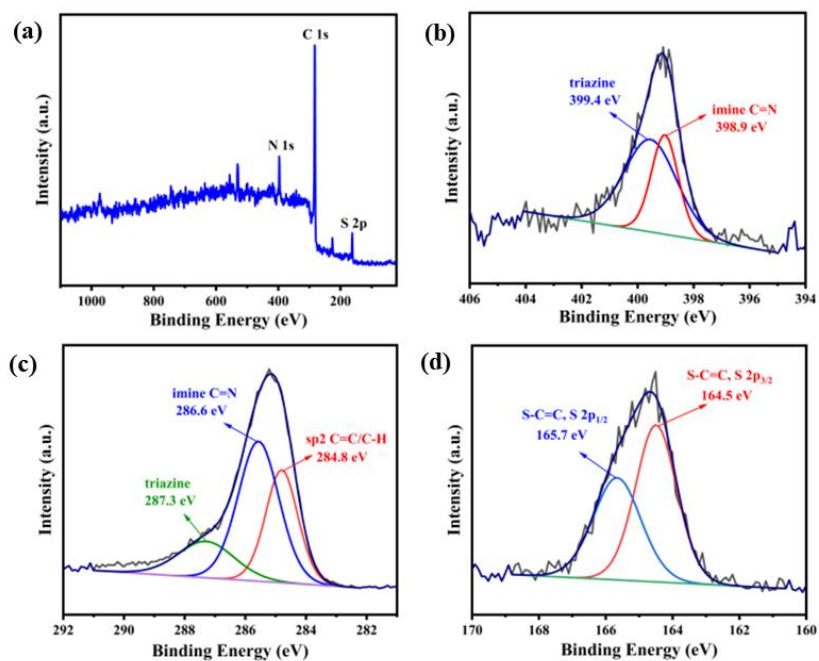

**Figure S10.** XPS spectra of COF-NUST-32. (a) Survey, (b) N 1s, (c) C 1s, and (d) S 2p.

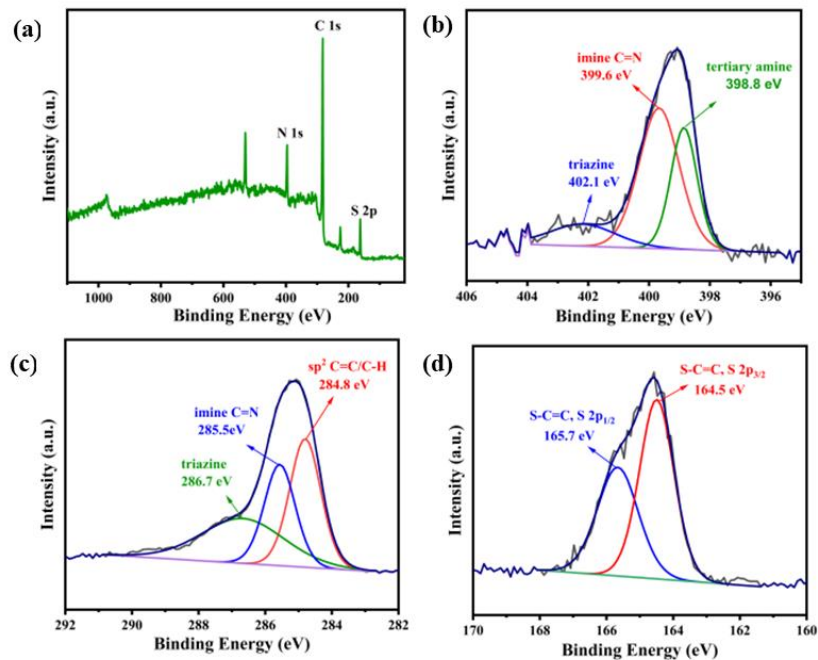

**Figure S11.** XPS spectra of COF-NUST-33. (a) Survey, (b) N 1s, (c) C 1s, and (d) S 2p.

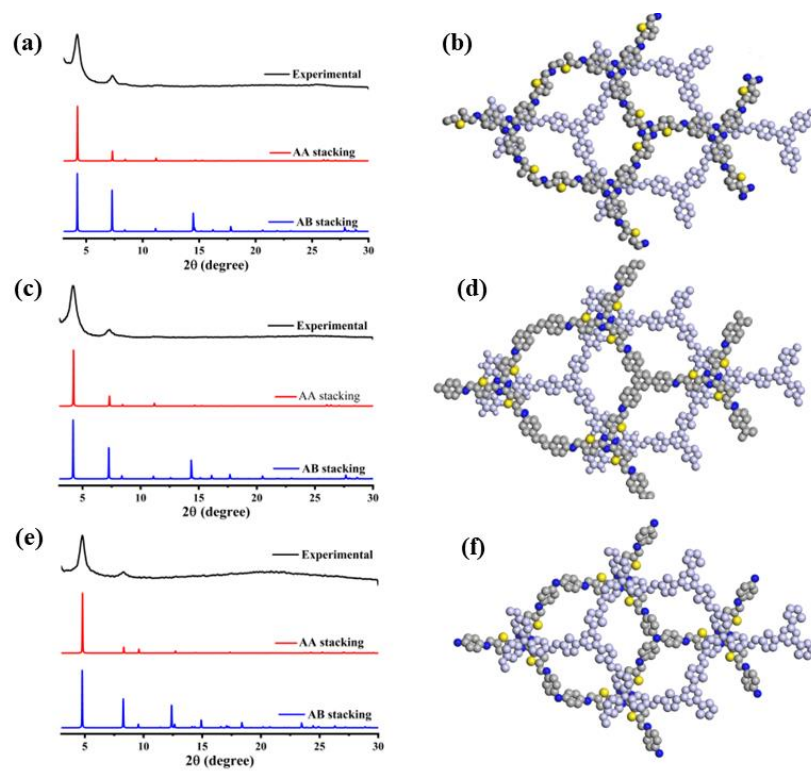

**Figure S12.** Simulated PXRD patterns and top views for AB stacking of COF-NUST-31 (a) (b), COF-NUST-32 (c) (d), and COF-NUST-33 (e) (f).

**Table S1.** Fractional atomic coordinates for simulated COF-NUST-31.

| Space group: <i>P3</i>                                                                                                  |          |          |         |
|-------------------------------------------------------------------------------------------------------------------------|----------|----------|---------|
| 3D hexagonal; $a = b = 24.34 \text{ \AA}$ , $c = 3.43 \text{ \AA}$ ; $\alpha = \beta = 90^\circ$ , $\gamma = 120^\circ$ |          |          |         |
| Atom                                                                                                                    | x        | y        | z       |
| N1                                                                                                                      | -0.28857 | -0.68586 | 1.21966 |
| C2                                                                                                                      | -0.26872 | -0.62332 | 1.22007 |
| C3                                                                                                                      | -0.20175 | -0.57769 | 1.16204 |
| C4                                                                                                                      | -0.17832 | -0.51361 | 1.11677 |
| C5                                                                                                                      | -0.11543 | -0.48283 | 1.02536 |
| C6                                                                                                                      | -0.09275 | -0.52438 | 1.00263 |
| S7                                                                                                                      | -0.14719 | -0.60124 | 1.09829 |
| C8                                                                                                                      | -0.02854 | -0.50666 | 0.88762 |
| N9                                                                                                                      | 0.00971  | -0.4505  | 0.75496 |
| C10                                                                                                                     | 0.073    | -0.42889 | 0.62491 |
| C11                                                                                                                     | 0.11404  | -0.3638  | 0.58913 |
| C12                                                                                                                     | 0.17722  | -0.34036 | 0.48822 |
| C13                                                                                                                     | 0.20006  | -0.38206 | 0.41766 |
| C14                                                                                                                     | 0.15799  | -0.44748 | 0.43308 |
| C15                                                                                                                     | 0.09497  | -0.47079 | 0.5334  |
| C16                                                                                                                     | 0.26803  | -0.35764 | 0.35605 |
| N17                                                                                                                     | 0.291    | -0.39784 | 0.35614 |
| H18                                                                                                                     | -0.20612 | -0.49044 | 1.13962 |
| H19                                                                                                                     | -0.08775 | -0.43254 | 0.96992 |
| H20                                                                                                                     | -0.01434 | -0.54186 | 0.91639 |
| H21                                                                                                                     | 0.09745  | -0.3311  | 0.65217 |
| H22                                                                                                                     | 0.20839  | -0.28964 | 0.47626 |
| H23                                                                                                                     | 0.17387  | -0.48084 | 0.37333 |
| H24                                                                                                                     | 0.06415  | -0.52146 | 0.53834 |

**Table S2.** Fractional atomic coordinates for simulated COF-NUST-32.

| Space group: $P3$                                                                                                       |          |          |         |
|-------------------------------------------------------------------------------------------------------------------------|----------|----------|---------|
| 3D hexagonal; $a = b = 24.28 \text{ \AA}$ , $c = 3.42 \text{ \AA}$ ; $\alpha = \beta = 90^\circ$ , $\gamma = 120^\circ$ |          |          |         |
| Atom                                                                                                                    | x        | y        | z       |
| C1                                                                                                                      | -0.27168 | -0.61945 | 0.05478 |
| N2                                                                                                                      | -0.31887 | -0.60515 | 0.05636 |
| C3                                                                                                                      | -0.20583 | -0.56954 | 0.11147 |
| C4                                                                                                                      | -0.1866  | -0.50578 | 0.15198 |
| C5                                                                                                                      | -0.12368 | -0.47111 | 0.25148 |
| C6                                                                                                                      | -0.09738 | -0.5098  | 0.28644 |
| S7                                                                                                                      | -0.14768 | -0.5881  | 0.19053 |
| C8                                                                                                                      | -0.03271 | -0.48892 | 0.41071 |
| N9                                                                                                                      | 0.00622  | -0.43031 | 0.50673 |
| C10                                                                                                                     | 0.07041  | -0.40863 | 0.62543 |
| C11                                                                                                                     | 0.11677  | -0.34588 | 0.54753 |
| C12                                                                                                                     | 0.181    | -0.32618 | 0.60125 |
| C13                                                                                                                     | 0.19992  | -0.36842 | 0.75313 |
| C14                                                                                                                     | 0.15202  | -0.42971 | 0.86514 |
| C15                                                                                                                     | 0.08847  | -0.45007 | 0.79262 |
| C16                                                                                                                     | 0.26845  | -0.35027 | 0.77926 |
| C17                                                                                                                     | 0.28624  | -0.39721 | 0.78137 |
| H18                                                                                                                     | -0.21738 | -0.48567 | 0.12095 |
| H19                                                                                                                     | -0.0987  | -0.42037 | 0.30565 |
| H20                                                                                                                     | -0.01791 | -0.52421 | 0.41063 |
| H21                                                                                                                     | 0.10344  | -0.31352 | 0.41795 |
| H22                                                                                                                     | 0.21496  | -0.27904 | 0.50051 |
| H23                                                                                                                     | 0.16266  | -0.46274 | 1.01081 |
| H24                                                                                                                     | 0.0537   | -0.49823 | 0.87261 |
| H25                                                                                                                     | 0.25012  | -0.44651 | 0.77663 |

**Table S3.** Fractional atomic coordinates for simulated COF-NUST-33.

| Space group: $P3$                                                                                                       |         |         |          |
|-------------------------------------------------------------------------------------------------------------------------|---------|---------|----------|
| 3D hexagonal; $a = b = 21.32 \text{ \AA}$ , $c = 4.05 \text{ \AA}$ ; $\alpha = \beta = 90^\circ$ , $\gamma = 120^\circ$ |         |         |          |
| Atom                                                                                                                    | x       | y       | z        |
| C1                                                                                                                      | 0.73804 | 0.38519 | 0.50336  |
| N2                                                                                                                      | 0.68611 | 0.40437 | 0.50145  |
| C3                                                                                                                      | 0.81323 | 0.43952 | 0.42626  |
| C4                                                                                                                      | 0.83777 | 0.51301 | 0.40127  |
| C5                                                                                                                      | 0.90531 | 0.54938 | 0.26004  |
| C6                                                                                                                      | 0.93007 | 0.50246 | 0.17895  |
| S7                                                                                                                      | 0.87285 | 0.41409 | 0.28264  |
| C8                                                                                                                      | 0.99861 | 0.52363 | 0.01171  |
| N9                                                                                                                      | 0.04384 | 0.59103 | -0.05877 |
| C10                                                                                                                     | 0.11437 | 0.61498 | -0.19581 |
| C11                                                                                                                     | 0.17139 | 0.68231 | -0.09819 |
| C12                                                                                                                     | 0.24287 | 0.70086 | -0.16646 |
| C13                                                                                                                     | 0.25911 | 0.65357 | -0.34468 |
| C14                                                                                                                     | 0.20042 | 0.5899  | -0.47566 |
| C15                                                                                                                     | 0.12907 | 0.56985 | -0.39621 |
| H18                                                                                                                     | 0.80667 | 0.53864 | 0.47035  |
| H19                                                                                                                     | 0.93421 | 0.60716 | 0.21033  |
| H20                                                                                                                     | 1.01281 | 0.48192 | -0.02947 |
| H21                                                                                                                     | 0.16083 | 0.71798 | 0.05438  |
| H22                                                                                                                     | 0.28484 | 0.75115 | -0.06686 |
| H23                                                                                                                     | 0.20943 | 0.55216 | -0.61522 |
| H24                                                                                                                     | 0.08587 | 0.51794 | -0.48244 |
| N                                                                                                                       | 0.33333 | 1.66667 | 0.63226  |

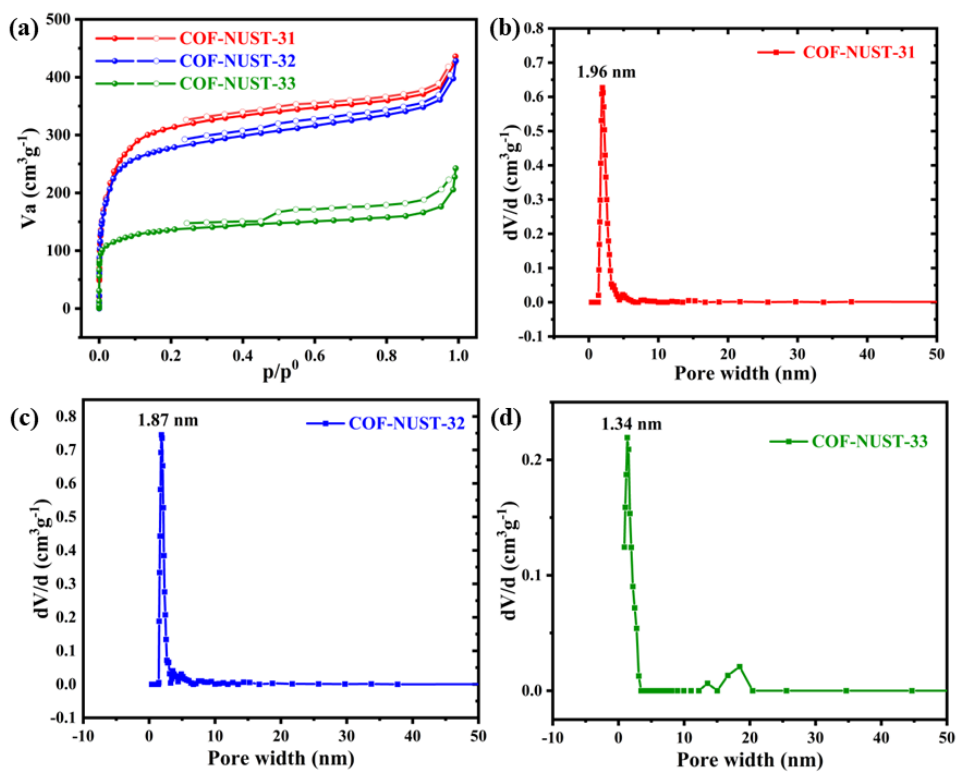

**Figure S13.** (a) N<sub>2</sub> adsorption-desorption isotherms at 77 K of COFs powders. Pore size distribution of COF-NUST-31 (b), COF-NUST-32 (c), and COF-NUST-33 (d).

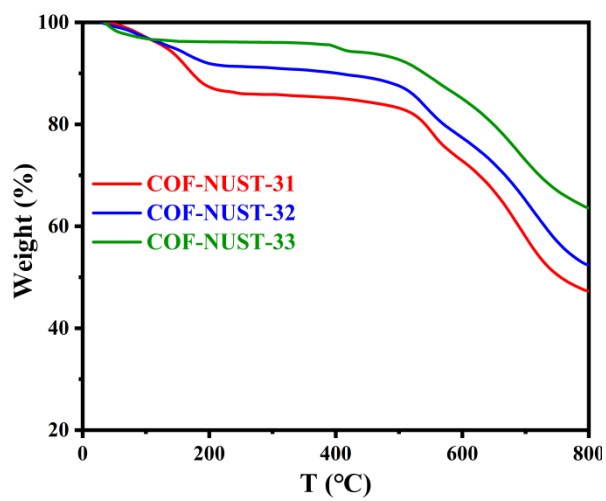

**Figure S14.** TGA curves of COFs.



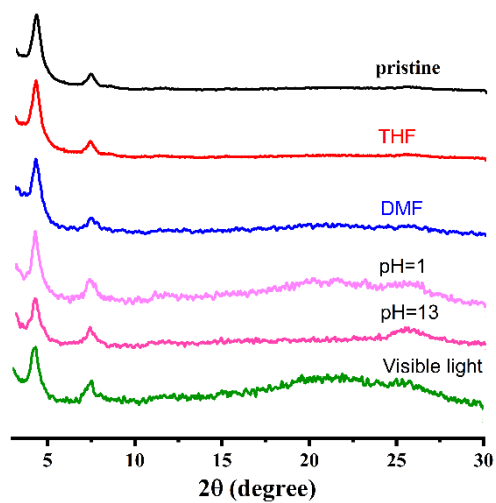

**Figure S15.** PXRD patterns at different conditions for COF-NUST-31.

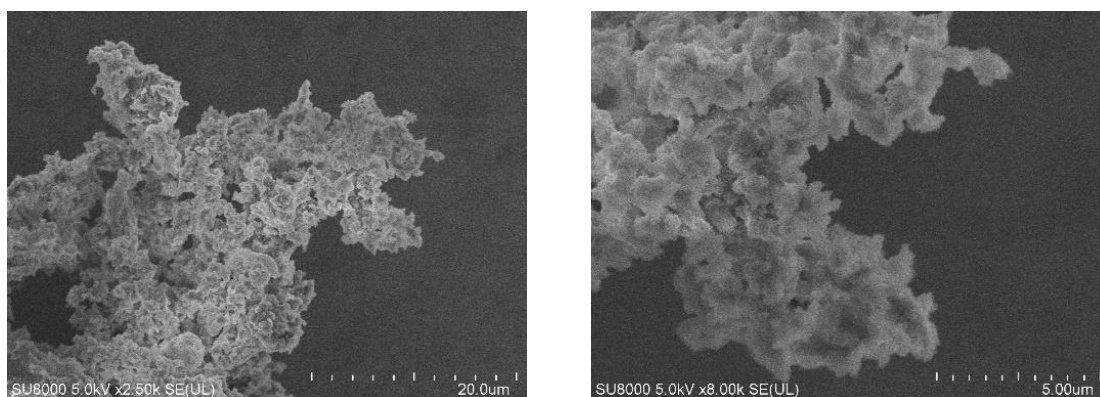

**Figure S16.** Scanning electron microscopy (SEM) images of COF-NUST-31.

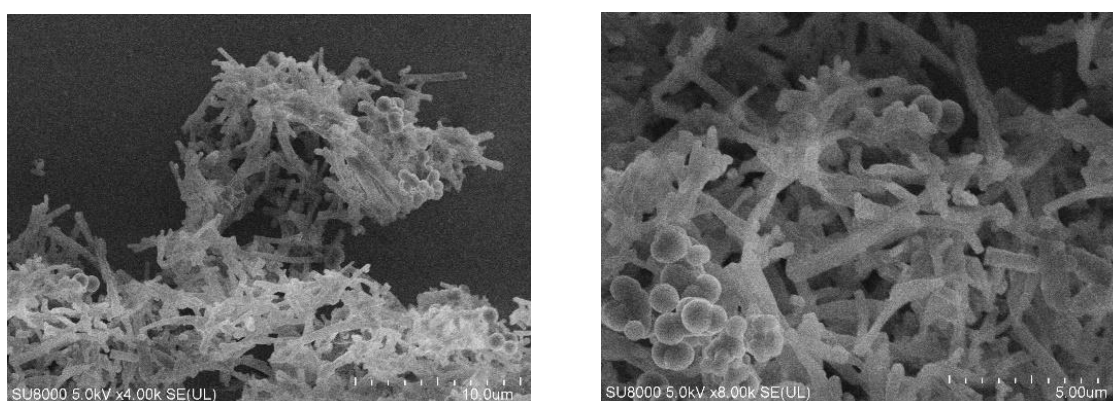

**Figure S17.** Scanning electron microscopy (SEM) images of COF-NUST-32.

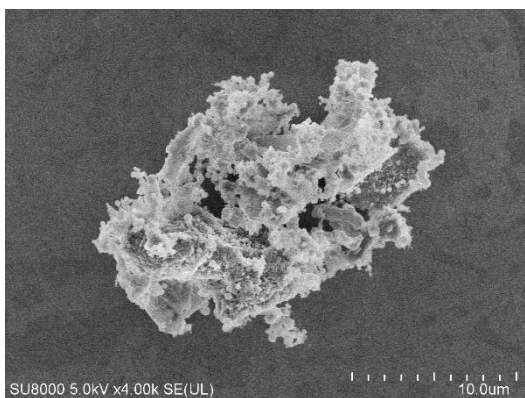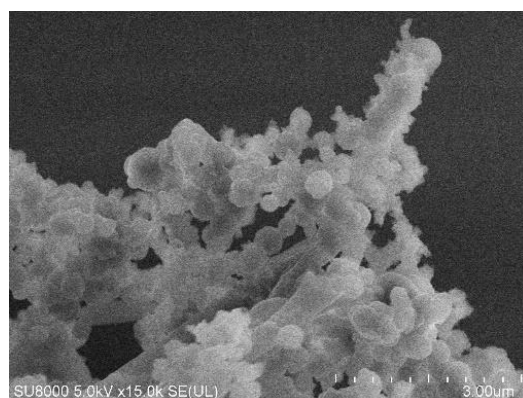

**Figure S18.** Scanning electron microscopy (SEM) images of COF-NUST-33.

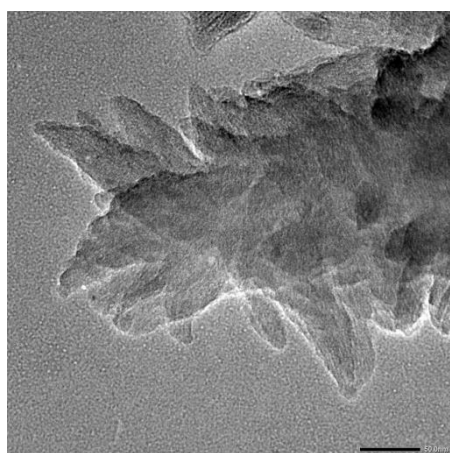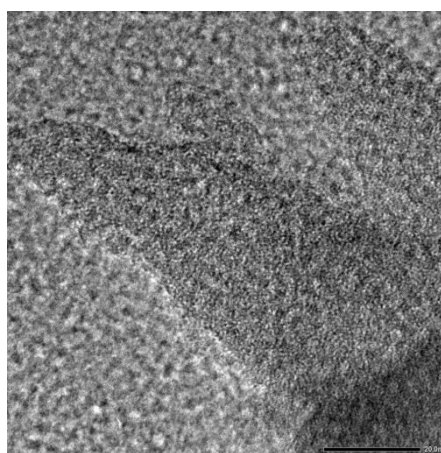

**Figure S19.** Transmission electron microscopy (TEM) images of COF-NUST-31.

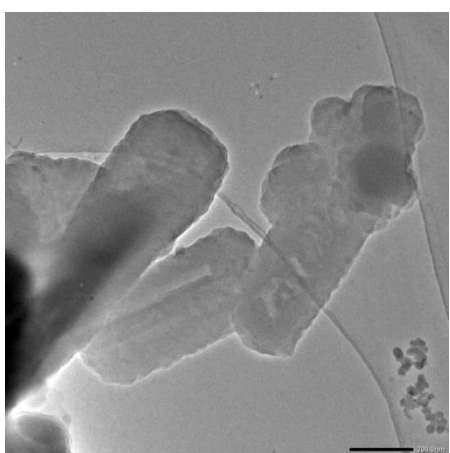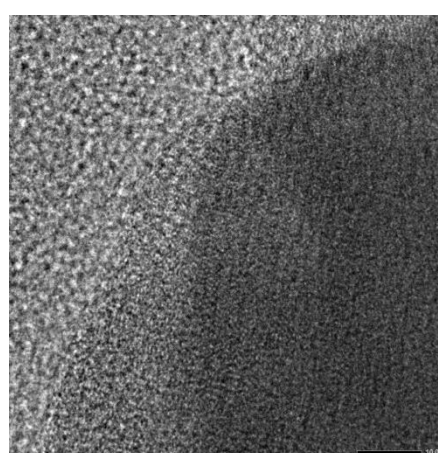

**Figure S20.** Transmission electron microscopy (TEM) images of COF-NUST-32.

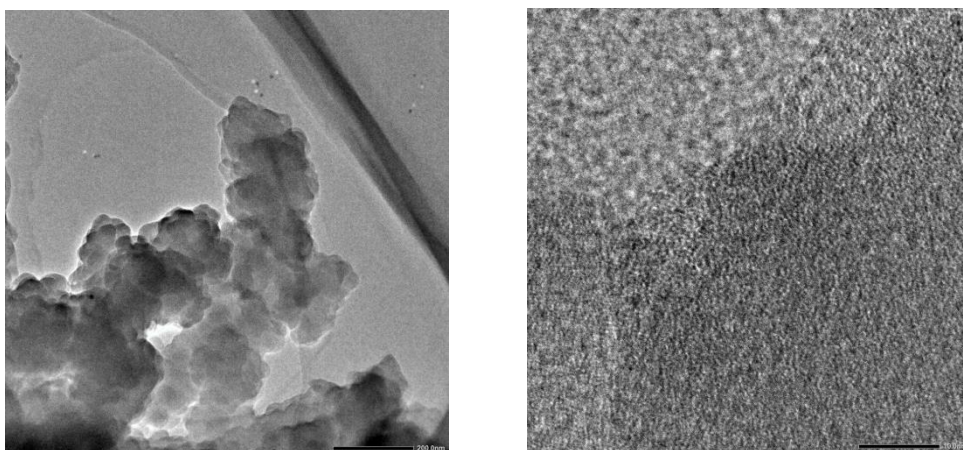

**Figure S21.** Transmission electron microscopy (TEM) images of COF-NUST-33.

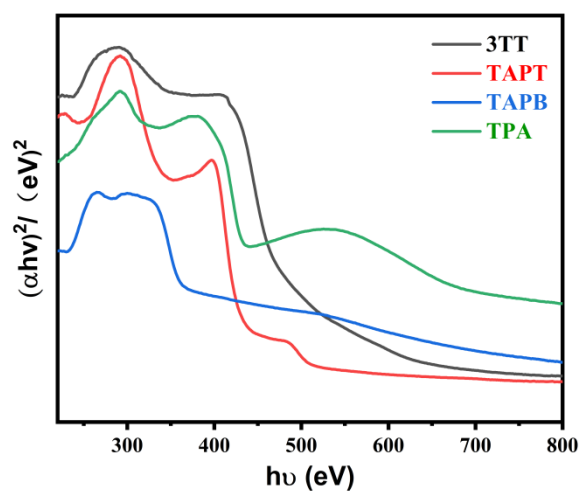

**Figure S22.** The UV-vis diffuse reflectance spectroscopy of monomers.

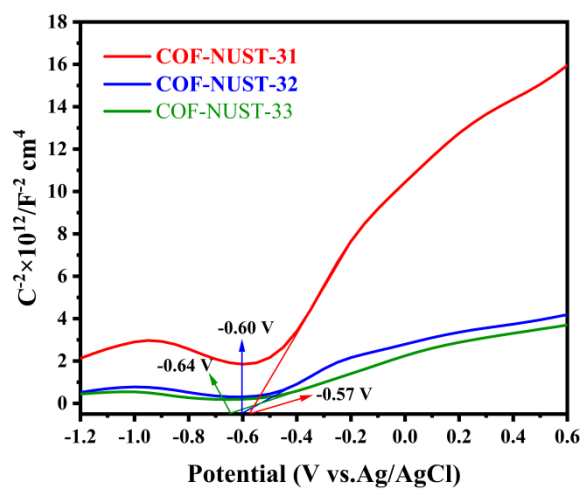

**Figure S23.** Mott-Schottky plots of COFs at frequencies of 1000 Hz.

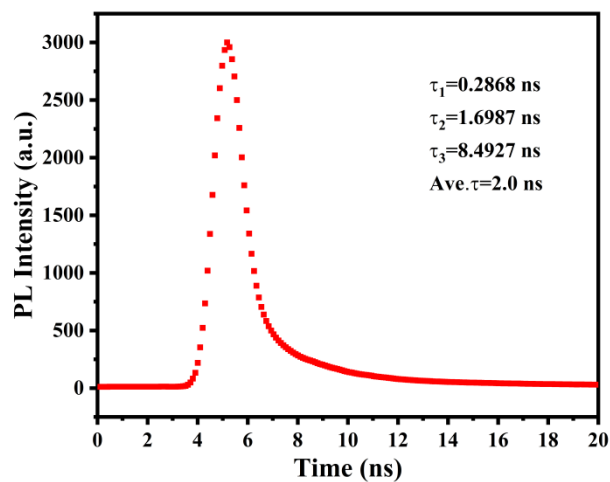

Figure S24. TRPL spectrum for COF-NUST-31.

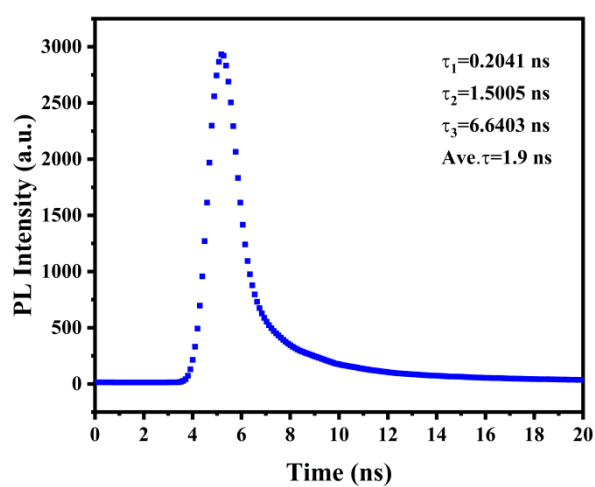

Figure S25. TRPL spectrum for COF-NUST-32.

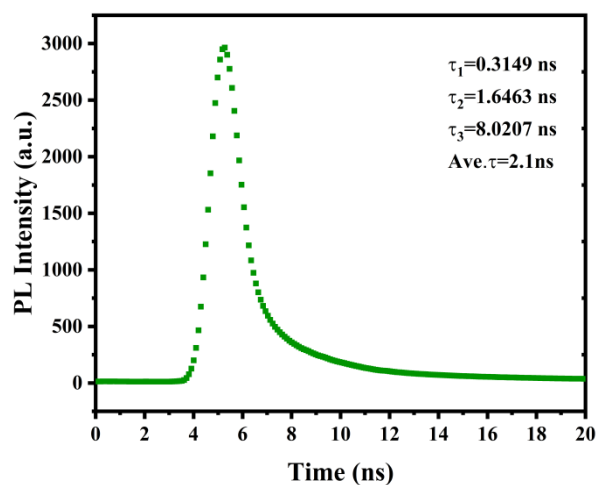

Figure S26. TRPL spectrum for COF-NUST-33.

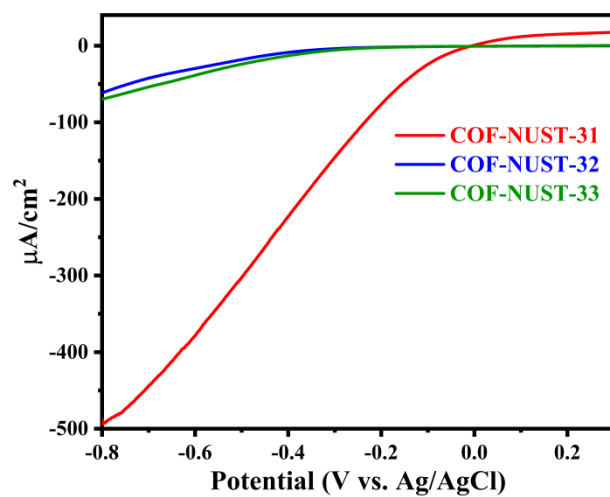

Figure S27. LSV curves under visible light irradiation.

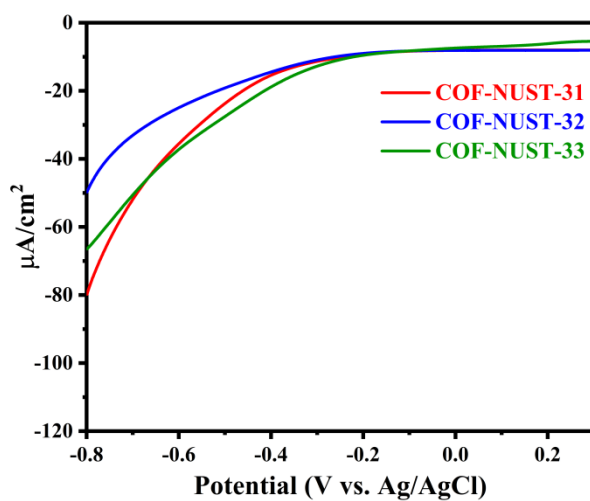

Figure S28. LSV curves under dark.

Table S4. The calculated HOMO-LUMO gaps of COFs (in eV)

|          | COF-NUST-31 | COF-NUST-32 | COF-NUST-33 |
|----------|-------------|-------------|-------------|
| HOMO     | -2.44       | -1.85       | -1.47       |
| LUMO     | -0.42       | -0.17       | -0.34       |
| Band gap | 2.01        | 1.68        | 1.13        |

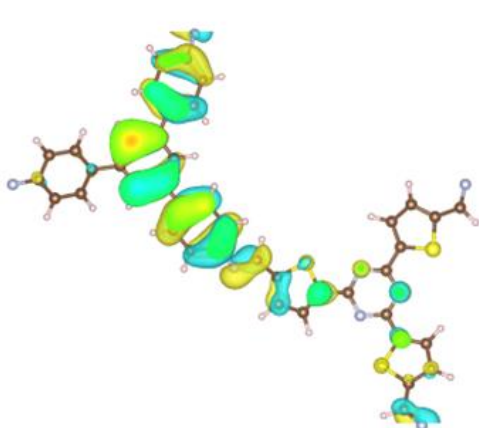

**COF-NUST-32**

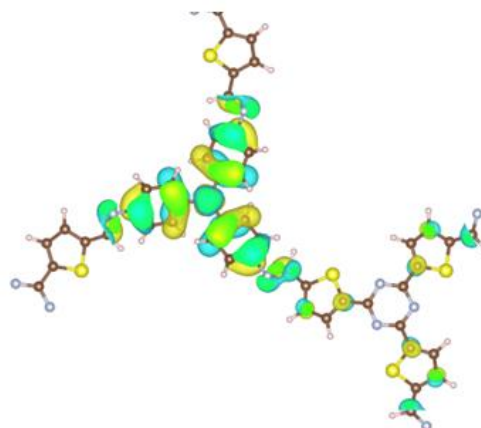

**COF-NUST-33**

**Figure S29.** HOMO of COF-NUST-32 and COF-NUST-33.

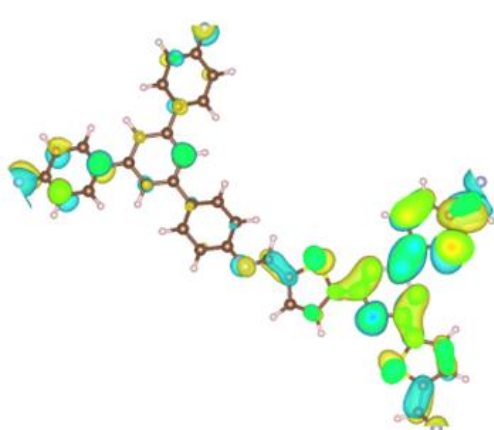

**COF-NUST-32**

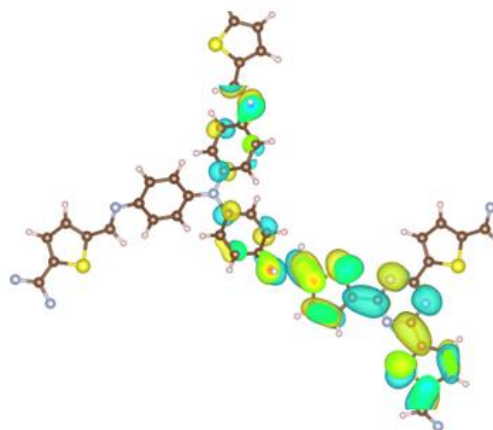

**COF-NUST-33**

**Figure S30.** LUMO of COF-NUST-32 and COF-NUST-33.

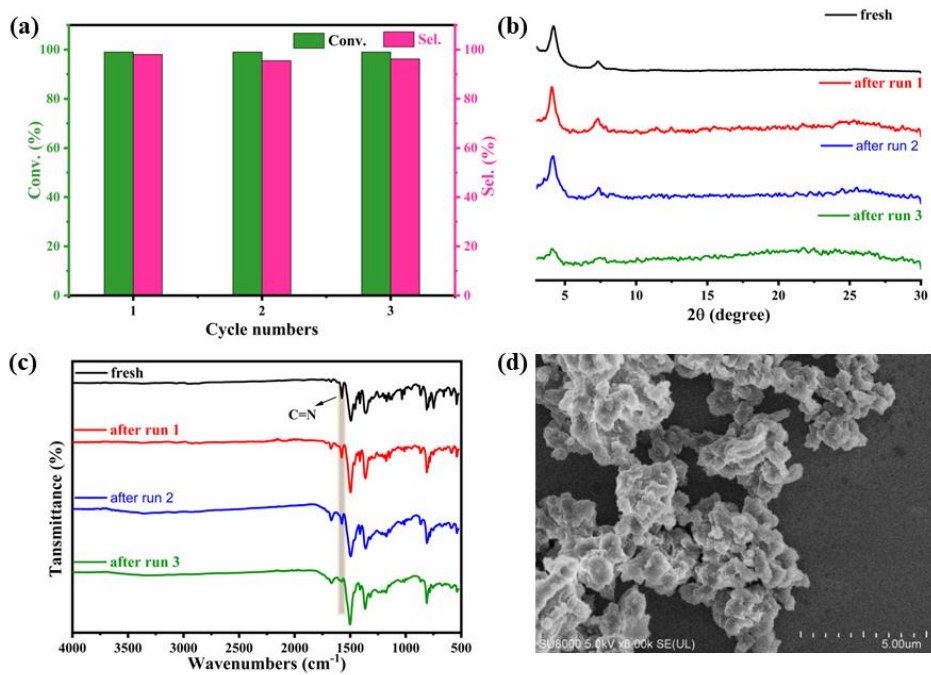

**Figure S31.** (a) The recycling ability of COF-NUST-31 in selective aerobic oxidation of sulfide. (b) PXRD of recovered COF-NUST-31. (c) Fourier transform infrared (FTIR) spectra of recovered COF-NUST-31. (d) Scanning electron microscopy (SEM) images of recovered COF-NUST-31.

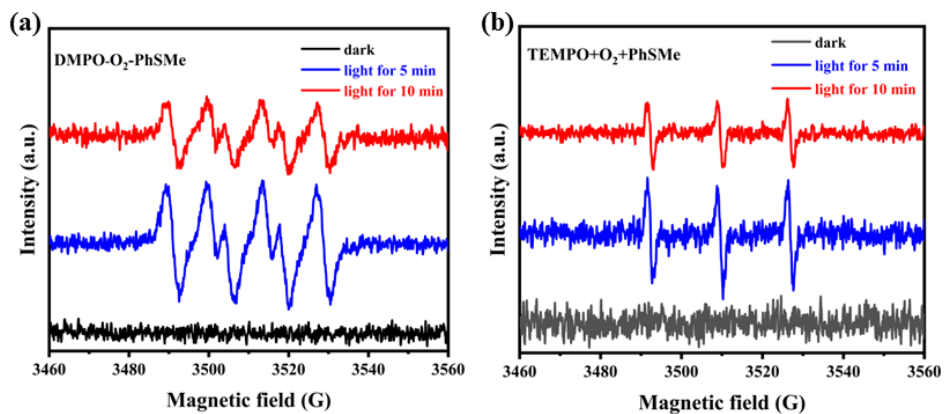

**Figure S32.**  $\cdot\text{O}_2^-$  and  $^1\text{O}_2$  signal attenuation after adding PhSMe under elongated light illumination.

**Table S5.** Photocatalytic performances in this work compared with previous results based on inorganic or organic materials in the literatures.

| Catalyst                                       | Catalyst weight (mg) | Substrate Amount (mmol)       | O <sub>2</sub> Pressue (atm) | Light source      | Time (h) | Yield (%) | Reference |
|------------------------------------------------|----------------------|-------------------------------|------------------------------|-------------------|----------|-----------|-----------|
| ARS-TiO <sub>2</sub>                           | 9.6 mg               | 0.3 mmol and 0.006 mmol TEMPO | 1 atm O <sub>2</sub>         | 300 W Xe lamp     | 3        | 84        | 1         |
| polyimide-P25                                  | 25 mg                | 0.3 mmol and 0.036 mmol ETA   | 1atm air                     | 12 W blue light   | 2        | 94        | 2         |
| Bi <sub>4</sub> O <sub>5</sub> Br <sub>2</sub> | 20 mg                | 0.2 mmol                      | 1 atm O <sub>2</sub>         | 30 W blue light   | 6        | 99        | 3         |
| TiO <sub>2</sub>                               | 40 mg                | 0.3 mmol                      | 1 atm O <sub>2</sub>         | 300 W Xe lamp     | 5        | 58        | 4         |
| Ti-MCM-48                                      | 25 mg                | 0.5 mmol and ARS (0.001 mmol) | 1 atm air                    | 12 W green light  | 1.1      | 91        | 5         |
| CF-HCP                                         | 5 mg                 | 0.2 mmol                      | 1 atm O <sub>2</sub>         | 100 W Green light | 6        | 99        | 6         |
| BBT@TiO <sub>2</sub> -0.8                      | 5 mg                 | 1 mmol                        | 1 atm O <sub>2</sub>         | Blue light        | 20       | 99        | 7         |
| AQ-COF                                         | 10 mg                | 0.1 mmol                      | 1 atm O <sub>2</sub>         | 300 W Xe lamp     | 3        | 99        | 8         |
| COF-NUST-32                                    | 4 mg                 | 0.1 mmol                      | 1 atm O <sub>2</sub>         | 30 W Blue light   | 4        | 98        | This work |



#### S4. Photocatalytic performances of $^1\text{H-NMR}$ spectra.

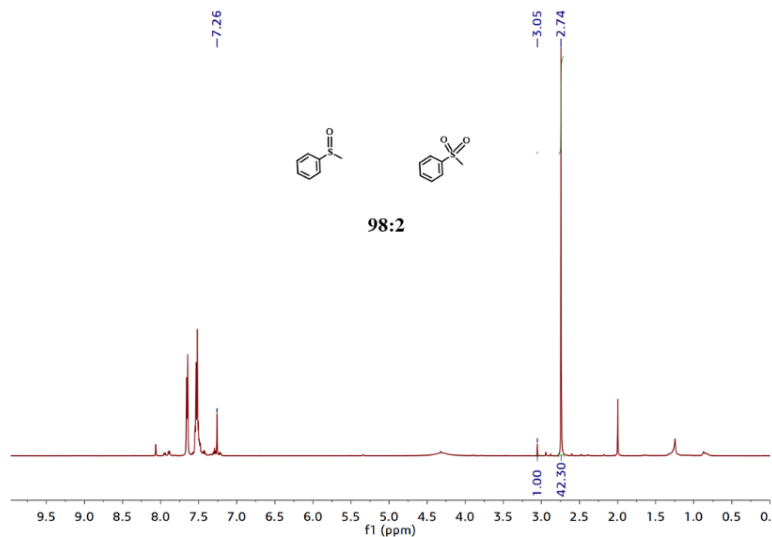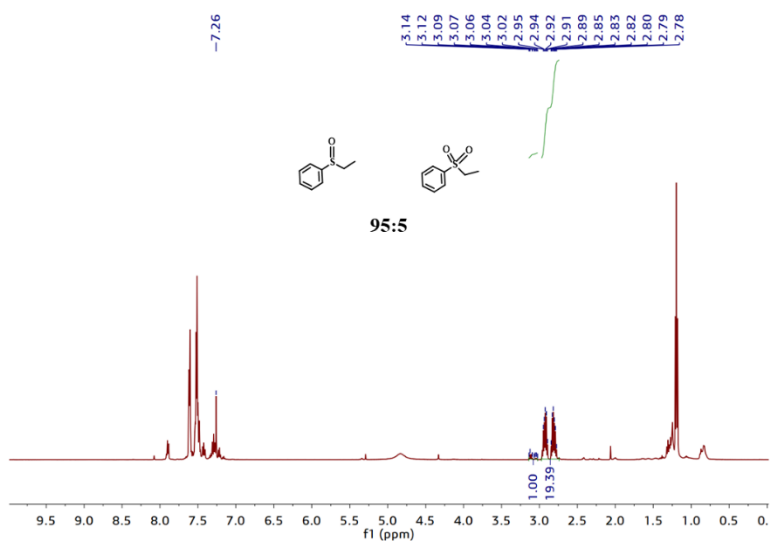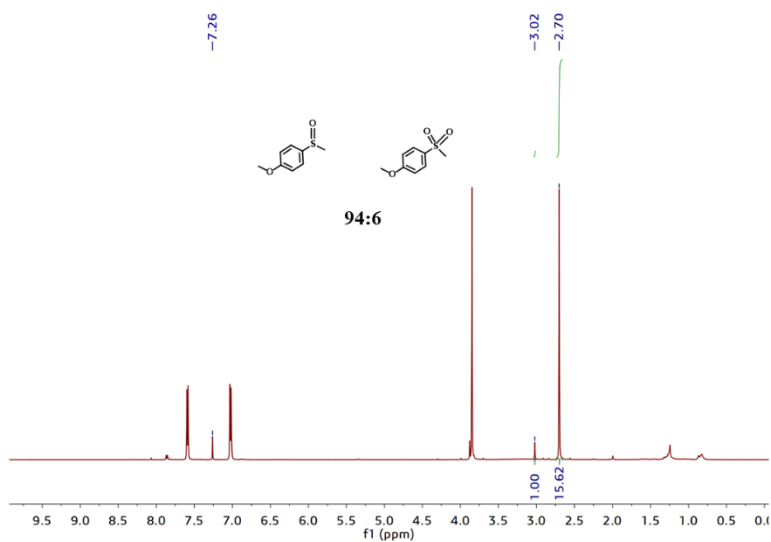

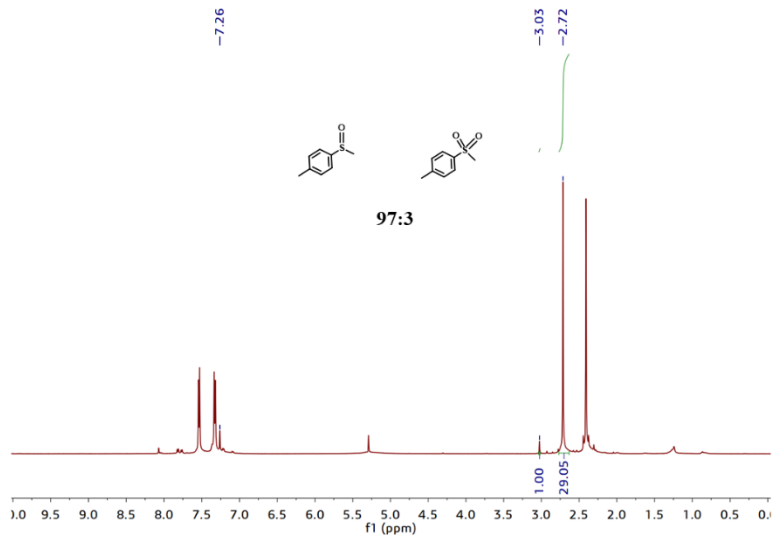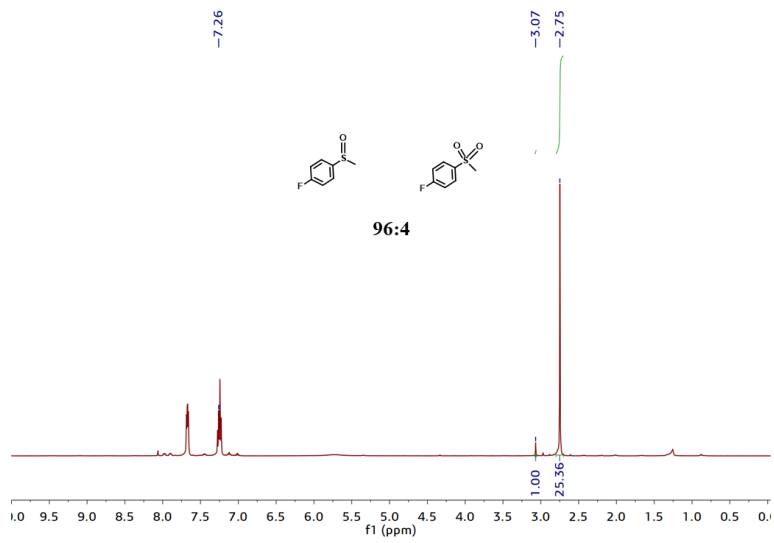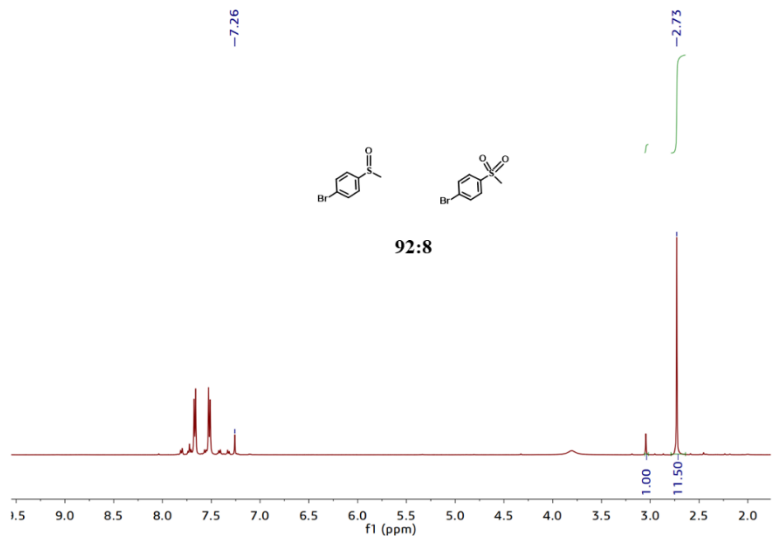

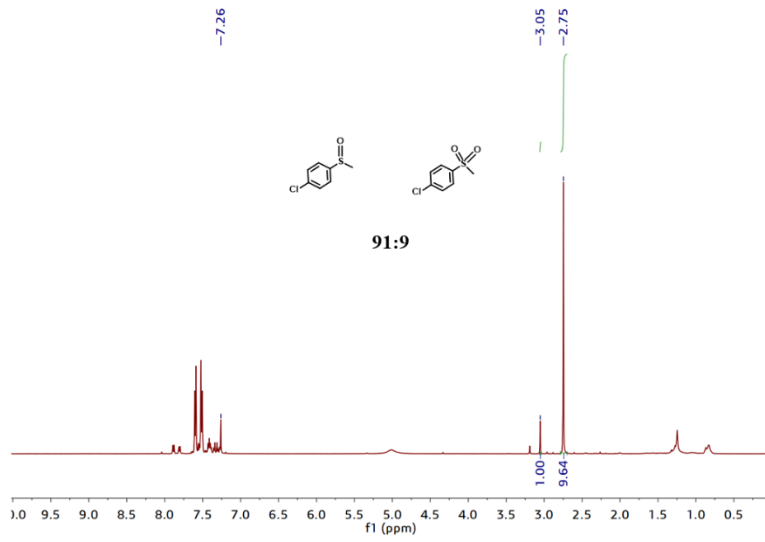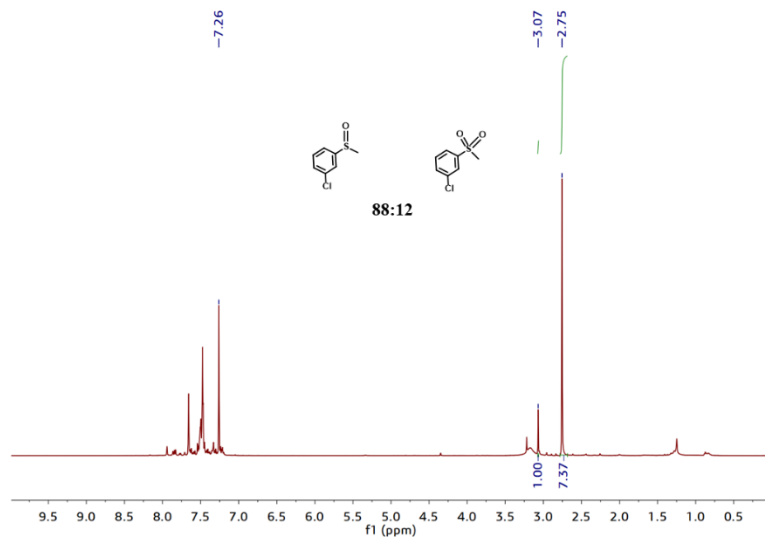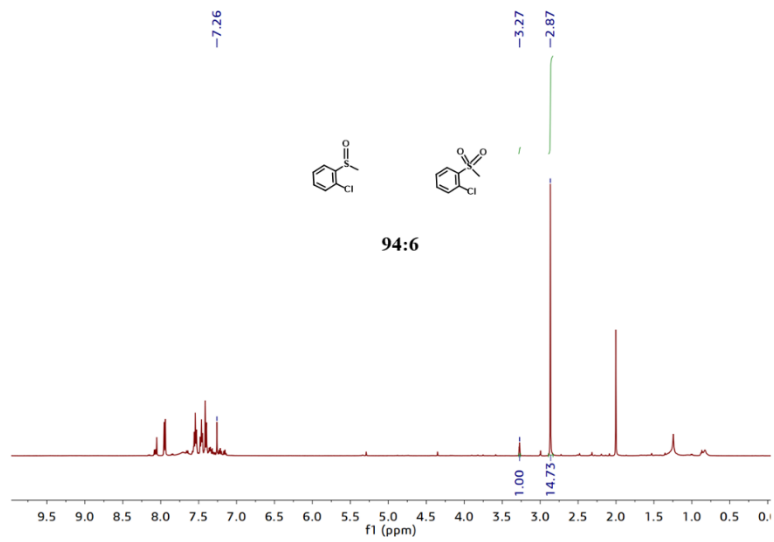

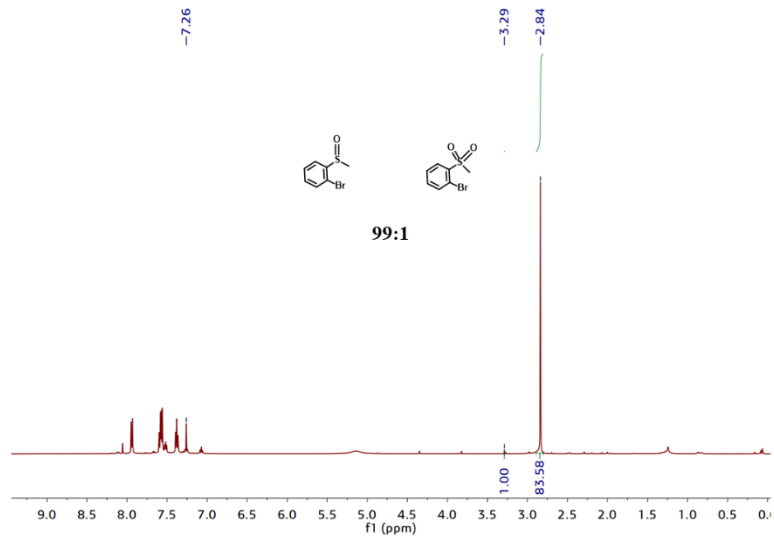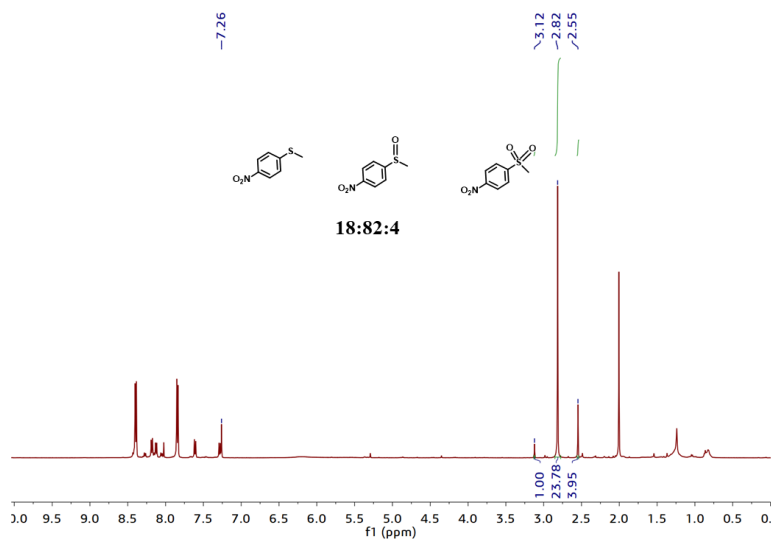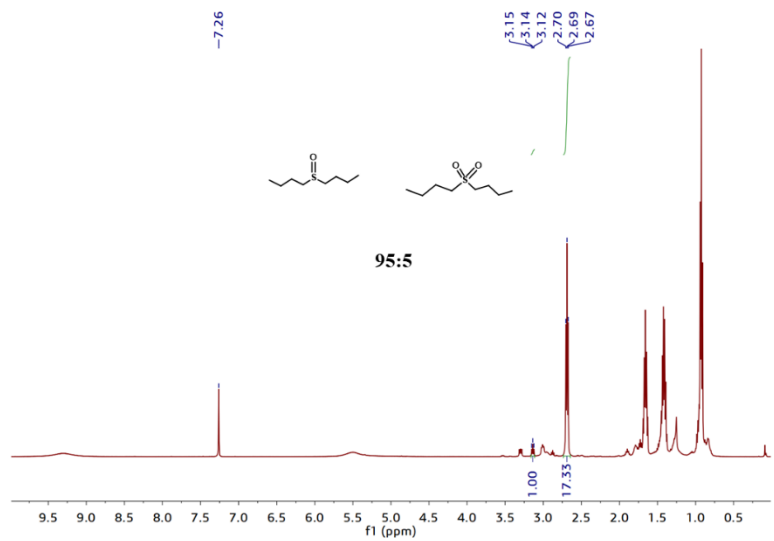

## S5. Reference

1. X. J. Lang, J. C. Zhao and X. D. Chen, *Angew. Chem., Int. Ed.*, 2016, **55**, 4697-4700.
2. W. L. Sheng, J. L. Shi, H. M. Hao, X. Li and X. J. Lang, *J. Colloid Interf Sci.*, 2020, **565**, 614-622.
3. W. Zhao, C. X. Yang, J. D. Huang, X. L. Jin, Y. Deng, L. Wang, F. Y. Su, H. Q. Xie, P. K. Wong and L. Q. Ye, *Green Chem.*, 2020, **22**, 4884-4889.
4. X. J. Lang, W. Hao, W. R. Leow, S. Z. Li, J. C. Zhao and X. D. Chen, *Chem. Sci.*, 2015, **6**, 5000-5005.
5. F. W. Huang, H. M. Hao, W. L. Sheng, X. Y. Dong and X. J. Lang, *Chem. Eng. J.*, 2022, **432**, 134285.
6. Y. F. Zhi, K. Li, H. Xia, M. Xue, Y. Mu and X. M. Liu, *J. Mater. Chem. A.*, 2017, **5**, 8697-8704.
7. C. Ayed, W. Huang, R. Li, L. C. da Silva, D. Wang, O. Suraeva, W. Najjar and K. A. I. Zhang, *Part. Part. Syst. Charact.*, 2018, **35**, 1700234.
8. Q. Li, X. W. Lan, G. Y. An, L. Ricardez-Sandoval, Z. G. Wang and G. Y. Bai, *ACS. Catal.*, 2020, **10**, 6664-6675.
